# Supplementary material for: Structural and functional insights into the LBD family involved in abiotic stress and flavonoid synthases in Camellia sinensis
Source: PubMed Central journal article supplement (PMC6821796; doi:10.1038/s41598-019-52027-6), 2019-10-30
Supplement: 41598_2019_52027_MOESM1_ESM.pdf [file 41598_2019_52027_MOESM1_ESM.pdf]

**Structural and functional insights into the LBD family involved in  
abiotic stress and flavonoid synthases in *Camellia sinensis***

Xueying Zhang<sup>1,#</sup>, Yuqing He<sup>2,#</sup>, Wenda He<sup>1</sup>, Hui Su<sup>1</sup>, Yuefei Wang<sup>1</sup>, Gaojie Hong<sup>2,\*</sup>  
and Ping Xu<sup>1,\*</sup>

1 Department of Tea Science, Zhejiang University, Hangzhou 310058, China

2 State Key Laboratory for Quality and Safety of Agro-products, Institute of Virology  
and Biotechnology, Zhejiang Academy of Agricultural Sciences, 198 Shiqiao Road  
310021, China

# These authors contributed equally to this work

\* Corresponding author Ping Xu (xuping2002@163.com) and Gaojie Hong  
(gjhong@126.com).

## Supplementary Figures

|           | CX2CX6CX3C                    | GAS block                                                                           | P | LX6LX3LX6            |
|-----------|-------------------------------|-------------------------------------------------------------------------------------|---|----------------------|
| CsLBD2_1  | : AASGRHQRKKCTDKVLAFFPVNK---- | SREQAVHVRVGVSNATKIVKMKKEEDRKK-AIDSLVWEPFCRIKDPILCPYG----                            |   | EYRKVVEELKIYKS : 100 |
| CsLBD2_2  | : AASGRHQRKKCTDKVLAFFPVNK---- | SREQAVHVRVGVSNATKIVKMKKEEDRKK-AIDSLVWEPFCRIKDPILCPYG----                            |   | EYRKVVEELKIYKS : 100 |
| CsLBD26_1 | : AASGRHQRKKCHGGIMAHFPSSK---- | TEEEAVHVRVGVSNVTKIKTKIDFARQKQ-AVNSFIWEPFWWKRFAHPLGHKIAETPNFSNEQRNYQN : 114          |   |                      |
| CsLBD26_2 | : AASGRHQRKKCHGGIMAHFPSSK---- | TEEEAVHVRVGVSNVTKIKTKIDFARQKQ-AVNSFIWEPFWWKRFAHPLGHKIAETPNFSNEQRNYQN : 114          |   |                      |
| CsLOB_1   | : FAAQFLRRKQMPGIFAFVPPPEE---- | PQKSNVHRIIGASNVTKLNEILPHQED-AVNSIAYEAEAVRDPVYCVGASVLRGQVRELKQIDDA : 106             |   |                      |
| CsLOB_2   | : FAAQFLRRKQMPGIFAFVPPPEE---- | PQKSNVHRIIGASNVTKLNEILPHQED-AVNSIAYEAEAVRDPVYCVGASVLRGQVRELKQIDDA : 106             |   |                      |
| CsLOB_3   | : FAAQFLRRKQMPGIFAFVPPPEE---- | PHKSNVHRIIGASNVTKLNEILPHQED-AVNSIAYEAEAVRDPVYCVGASVLRGQVRELKQIDDA : 106             |   |                      |
| CsLOB_4   | : FAAQFLRRKQMPGIFAFVPPPEE---- | PQKSNVHRIIGASNVTKLNEILPHQED-AVNSIAYEAEAVRDPVYCVGASVLRGQVRELKQIDDA : 112             |   |                      |
| CsLBD36_1 | : FAAQFLRRKQMPGIFAFVPPPEE---- | PQKSNVHRIIGASNVTKLNEILPHQED-AVNSIAYEAEAVRDPVYCVGASVLRGQVRELKQIDDA : 103             |   |                      |
| CsLBD36_2 | : FAAQFLRRKQMPGIFAFVPPPEE---- | PQKSNVHRIIGASNVTKLNEILPHQED-AVNSIAYEAEAVRDPVYCVGASVLRGQVRELKQIDDA : 103             |   |                      |
| CsLBD6    | : FAAQFLRRKQMPGIFAFVPPPEE---- | PQKSNVHRIIGASNVTKLNEILPHQED-AVNSIAYEAEAVRDPVYCVGASVLRGQVRELKQIDDA : 110             |   |                      |
| CsLBD15_1 | : SAAQFLRRKQMPGIFAFVPPPEE---- | PKKSNVHRIIGASNVTKLNEILPHQED-AVNSIAYEAEAVRDPVYCVGASVLRGQVRELKQIDDA : 107             |   |                      |
| CsLBD15_2 | : SAAQFLRRKQMPGIFAFVPPPEE---- | PKKSNVHRIIGASNVTKLNEILPHQED-AVNSIAYEAEAVRDPVYCVGASVLRGQVRELKQIDDA : 153             |   |                      |
| CsLBD15_3 | : SAAQFLRRKQMPGIFAFVPPPEE---- | PKKSNVHRIIGASNVTKLNEILPHQED-AVNSIAYEAEAVRDPVYCVGASVLRGQVRELKQIDDA : 169             |   |                      |
| CsLBD13   | : SAAQFLRRKQMPGIFAFVPPPEE---- | PKKSNVHRIIGASNVTKLNEILPHQED-AVNSIAYEAEAVRDPVYCVGASVLRGQVRELKQIDDA : 145             |   |                      |
| CsLBD1_1  | : FAAQFLRRKQMPGIFAFVPPPEE---- | PLKSNVHRIIGASNVTKLNEILPHQED-AVNSIAYEAEAVRDPVYCVGASVLRGQVRELKQIDDA : 136             |   |                      |
| CsLBD1_2  | : FAAQFLRRKQMPGIFAFVPPPEE---- | PLKSNVHRIIGASNVTKLNEILPHQED-AVNSIAYEAEAVRDPVYCVGASVLRGQVRELKQIDDA : 141             |   |                      |
| CsLBD11_1 | : FAGAKLRRKQMPGIFAFVPPPEE---- | LFKSNVHRIIGASNVTKLNEILPHQED-AVNSIAYEAEAVRDPVYCVGASVLRGQVRELKQIDDA : 126             |   |                      |
| CsLBD11_2 | : FAGAKLRRKQMPGIFAFVPPPEE---- | PLRSTIAHRIIGASNVTKLNEILPHQED-AVNSIAYEAEAVRDPVYCVGASVLRGQVRELKQIDDA : 153            |   |                      |
| CsLBD11_3 | : FAGAKLRRKQMPGIFAFVPPPEE---- | PLRSTIAHRIIGASNVTKLNEILPHQED-AVNSIAYEAEAVRDPVYCVGASVLRGQVRELKQIDDA : 142            |   |                      |
| CsLBD4_1  | : FAAQFLRRKQMPGIFAFVPPPEE---- | PHKSNVHRIIGASNVTKLNEILPHQED-AVNSIAYEAEAVRDPVYCVGASVLRGQVRELKQIDDA : 112             |   |                      |
| CsLBD4_2  | : FAAQFLRRKQMPGIFAFVPPPEE---- | PHKSNVHRIIGASNVTKLNEILPHQED-AVNSIAYEAEAVRDPVYCVGASVLRGQVRELKQIDDA : 110             |   |                      |
| CsLBD12_2 | : FAGAKLRRKQMPGIFAFVPPPEE---- | PHKSNVHRIIGASNVTKLNEILPHQED-AVNSIAYEAEAVRDPVYCVGASVLRGQVRELKQIDDA : 102             |   |                      |
| CsLBD12_3 | : FAGAKLRRKQMPGIFAFVPPPEE---- | PRKSNVHRIIGASNVTKLNEILPHQED-AVNSIAYEAEAVRDPVYCVGASVLRGQVRELKQIDDA : 102             |   |                      |
| CsLBD12_1 | : FAGAKLRRKQMPGIFAFVPPPEE---- | PHKSNVHRIIGASNVTKLNEILPHQED-AVNSIAYEAEAVRDPVYCVGASVLRGQVRELKQIDDA : 102             |   |                      |
| CsLBD16_1 | : FAGAKLRRKQMPGIFAFVPPPEE---- | GPASNVHRIIGASNVTKLNEILPHQED-AVNSIAYEAEAVRDPVYCVGASVLRGQVRELKQIDDA : 107             |   |                      |
| CsLBD16_2 | : FAGAKLRRKQMPGIFAFVPPPEE---- | GPASNVHRIIGASNVTKLNEILPHQED-AVNSIAYEAEAVRDPVYCVGASVLRGQVRELKQIDDA : 93              |   |                      |
| CsLBD17   | : FAGAKLRRKQMPGIFAFVPPPEE---- | SATHSNVHRIIGASNVTKLNEILPHQED-AVNSIAYEAEAVRDPVYCVGASVLRGQVRELKQIDDA : 104            |   |                      |
| CsLBD29   | : FAGAS-----                  | HKVSNVHRIIGASNVTKLNEILPHQED-AVNSIAYEAEAVRDPVYCVGASVLRGQVRELKQIDDA : 76              |   |                      |
| CsLBD30   | : FAGAKLRRKQMPGIFAFVPPPEE---- | GAHSAVHRIIGASNVTKLNEILPHQED-AVNSIAYEAEAVRDPVYCVGASVLRGQVRELKQIDDA : 115             |   |                      |
| CsLBD18   | : FAGAKLRRKQMPGIFAFVPPPEE---- | GAHSAVHRIIGASNVTKLNEILPHQED-AVNSIAYEAEAVRDPVYCVGASVLRGQVRELKQIDDA : 136             |   |                      |
| CsLBD31   | : FAGAKLRRKQMPGIFAFVPPPEE---- | GTASNVHRIIGASNVTKLNEILPHQED-AVNSIAYEAEAVRDPVYCVGASVLRGQVRELKQIDDA : 112             |   |                      |
| CsLBD19   | : FAGAKLRRKQMPGIFAFVPPPEE---- | GSASNVHRIIGASNVTKLNEILPHQED-AVNSIAYEAEAVRDPVYCVGASVLRGQVRELKQIDDA : 112             |   |                      |
| CsLBD33   | : SGAQFLRRKQMPGIFAFVPPPEE---- | AAASNVHRIIGASNVTKLNEILPHQED-AVNSIAYEAEAVRDPVYCVGASVLRGQVRELKQIDDA : 104             |   |                      |
| CsLBD20   | : FAGAKLRRKQMPGIFAFVPPPEE---- | GAASNVHRIIGASNVTKLNEILPHQED-AVNSIAYEAEAVRDPVYCVGASVLRGQVRELKQIDDA : 136             |   |                      |
| CsLBD23   | : FAAQFLRRKQMPGIFAFVPPPEE---- | PEKSNVHRIIGASNVTKLNEILPHQED-AVNSIAYEAEAVRDPVYCVGASVLRGQVRELKQIDDA : 93              |   |                      |
| CsLBD24   | : FAAQFLRRKQMPGIFAFVPPPEE---- | PEKSNVHRIIGASNVTKLNEILPHQED-AVNSIAYEAEAVRDPVYCVGASVLRGQVRELKQIDDA : 91              |   |                      |
| CsLBD7_1  | : AQAQFLRRKQMPGIFAFVPPPEE---- | HQKLNHRIIGASNVTKLNEILPHQED-AVNSIAYEAEAVRDPVYCVGASVLRGQVRELKQIDDA : 139              |   |                      |
| CsLBD22   | : AQAQFLRRKQMPGIFAFVPPPEE---- | HQKLNHRIIGASNVTKLNEILPHQED-AVNSIAYEAEAVRDPVYCVGASVLRGQVRELKQIDDA : 129              |   |                      |
| CsLBD7_2  | : AQAQFLRRKQMPGIFAFVPPPEE---- | HKHLSNVHRIIGASNVTKLNEILPHQED-AVNSIAYEAEAVRDPVYCVGASVLRGQVRELKQIDDA : 122            |   |                      |
| CsLBD27_2 | : AQAQFLRRKQMPGIFAFVPPPEE---- | PKMNSNVHRIIGASNVTKLNEILPHQED-AVNSIAYEAEAVRDPVYCVGASVLRGQVRELKQIDDA : 106            |   |                      |
| CsLBD27_3 | : AQAQFLRRKQMPGIFAFVPPPEE---- | PKMNSNVHRIIGASNVTKLNEILPHQED-AVNSIAYEAEAVRDPVYCVGASVLRGQVRELKQIDDA : 100            |   |                      |
| CsLBD27_1 | : AQAQFLRRKQMPGIFAFVPPPEE---- | PKMNSNVHRIIGASNVTKLNEILPHQED-AVNSIAYEAEAVRDPVYCVGASVLRGQVRELKQIDDA : 153            |   |                      |
| CsLBD34   | : AQAQFLRRKQMPGIFAFVPPPEE---- | PKMNSNVHRIIGASNVTKLNEILPHQED-AVNSIAYEAEAVRDPVYCVGASVLRGQVRELKQIDDA : 107            |   |                      |
| CsLBD39_1 | : SNGQFLRRKQMPGIFAFVPPPEE---- | ILRSCLQWIDSPSCAHATVFAAFPRAGIMSPSSPNSQPD-LFCSLFFFCGTVNPNNAVGLWTCGNWHCOAAVAVTLR : 103 |   |                      |
| CsLBD32_2 | : SNGQFLRRKQMPGIFAFVPPPEE---- | ILRSCLQWIDSPSCAHATVFAAFPRAGIMSPSSPNSQPD-LFCSLFFFCGTVNPNNAVGLWTCGNWHCOAAVAVTLR : 103 |   |                      |
| CsLBD38_1 | : SNGQFLRRKQMPGIFAFVPPPEE---- | ILRSCLQWIDSPSCAHATVFAAFPRAGIMSPSSPNSQPD-LFCSLFFFCGTVNPNNAVGLWTCGNWHCOAAVAVTLR : 105 |   |                      |
| CsLBD37_1 | : SNGQFLRRKQMPGIFAFVPPPEE---- | ILRSCLQWIDSPSCAHATVFAAFPRAGIMSPSSPNSQPD-LFCSLFFFCGTVNPNNAVGLWTCGNWHCOAAVAVTLR : 107 |   |                      |
| CsLBD37_2 | : SNGQFLRRKQMPGIFAFVPPPEE---- | ILRSCLQWIDSPSCAHATVFAAFPRAGIMSPSSPNSQPD-LFCSLFFFCGTVNPNNAVGLWTCGNWHCOAAVAVTLR : 101 |   |                      |
| CsLBD38_2 | : SNGQFLRRKQMPGIFAFVPPPEE---- | ILRSCLQWIDSPSCAHATVFAAFPRAGIMSPSSPNSQPD-LFCSLFFFCGTVNPNNAVGLWTCGNWHCOAAVAVTLR : 70  |   |                      |
| CsLBD41_1 | : SNGQFLRRKQMPGIFAFVPPPEE---- | ILRSCLQWIDSPSCAHATVFAAFPRAGIMSPSSPNSQPD-LFCSLFFFCGTVNPNNAVGLWTCGNWHCOAAVAVTLR : 105 |   |                      |
| CsLBD41_2 | : SNGQFLRRKQMPGIFAFVPPPEE---- | ILRSCLQWIDSPSCAHATVFAAFPRAGIMSPSSPNSQPD-LFCSLFFFCGTVNPNNAVGLWTCGNWHCOAAVAVTLR : 159 |   |                      |
| CsLBD40   | : RGVPLVLRKQMPGIFAFVPPPEE---- | TIRCLQWIKTPSCANATVFAAFPRAGIMSPSSPNSQPD-LFCSLFFFCGTVNPNNAVGLWTCGNWHCOAAVAVTLR : 120  |   |                      |
| CsLBD42   | : SNGQFLRRKQMPGIFAFVPPPEE---- | ILRSCLQWIDSPSCAHATVFAAFPRAGIMSPSSPNSQPD-LFCSLFFFCGTVNPNNAVGLWTCGNWHCOAAVAVTLR : 105 |   |                      |

**Supplementary Figure 1. Comparison of the amino acid sequences of CsLBDs.**

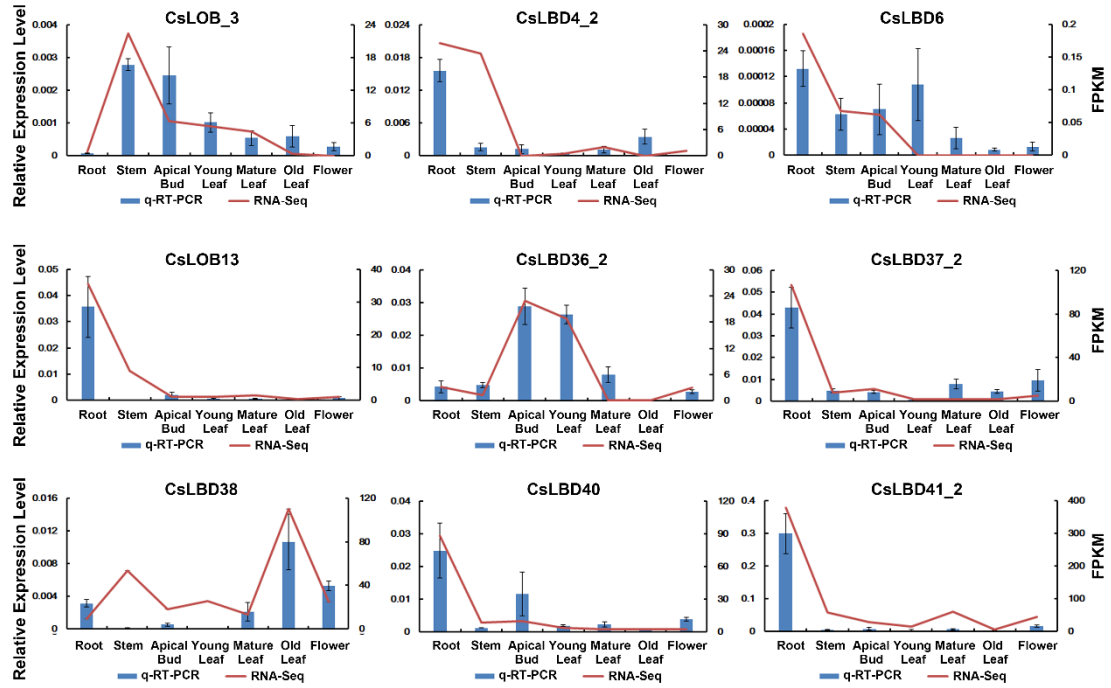

**Supplement Figure 2. Expression patterns of the nine *CsLBDs* in different tissues.**

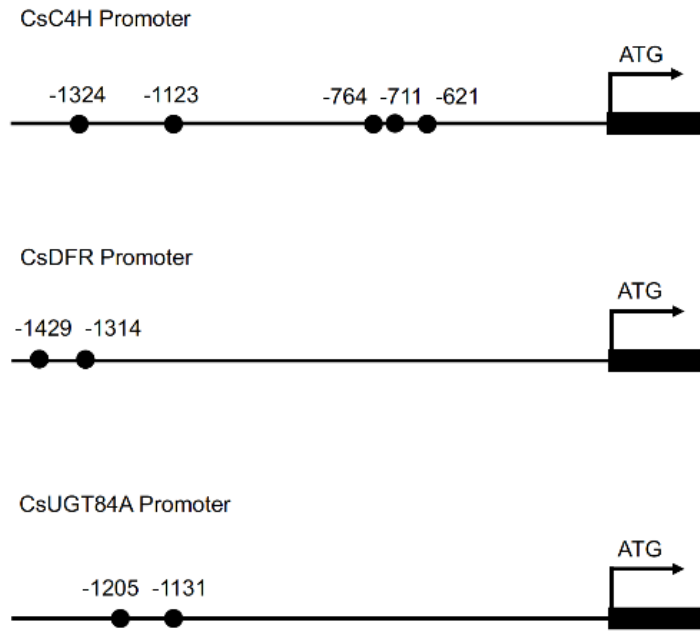

**Supplementary Figure 3. Analysis of LBD binding site in the promoter region of structural genes involved in the flavonoid pathway.**
